## RESEARCH ARTICLES

# Confocal Raman microspectroscopy reveals a convergence of the chemical composition in methanogenic archaea from a Siberian permafrost-affected soil

Paloma Serrano<sup>1,2</sup>, Antje Hermelink<sup>3</sup>, Peter Lasch<sup>3</sup>, Jean-Pierre de Vera<sup>4</sup>, Nicole König<sup>3</sup>, Oliver Burckhardt<sup>1</sup> and Dirk Wagner<sup>1,\*</sup>

<sup>1</sup>GFZ German Research Centre for Geosciences, Helmholtz Centre Potsdam, Section Geomicrobiology, Telegrafenberg, 14473 Potsdam, Germany, <sup>2</sup>Alfred Wegener Institute Helmholtz Centre for Polar and Marine Research, Telegrafenberg A45 14473 Potsdam, Germany, <sup>3</sup>Robert Koch Institute, Centre for Biological Threats and Special Pathogens, Nordufer 20 13353 Berlin, Germany and <sup>4</sup>German Aerospace Center (DLR) Berlin, Institute of Planetary Research, Rutherfordstraße 2 12489 Berlin, Germany

\*Corresponding author: GFZ German Research Centre for Geosciences, Helmholtz Centre Potsdam, Section Geomicrobiology, Telegrafenberg, 14473 Potsdam, Germany. Tel: +49 331 288 28800; Fax: +49 331 288 28802; E-mail: [Dirk.Wagner@gfz-potsdam.de](mailto:Dirk.Wagner@gfz-potsdam.de)

**One sentence summary:** Confocal Raman microspectroscopy was used to show that the chemical composition of methanogens isolated from permafrost soils is remarkably different from that of non-permafrost environments.

**Editor:** Tillmann Lueders

## ABSTRACT

Methanogenic archaea are widespread anaerobic microorganisms responsible for the production of biogenic methane. Several new species of psychrotolerant methanogenic archaea were recently isolated from a permafrost-affected soil in the Lena Delta (Siberia, Russia), showing an exceptional resistance against desiccation, osmotic stress, low temperatures, starvation, UV and ionizing radiation when compared to methanogens from non-permafrost environments. To gain a deeper insight into the differences observed in their resistance, we described the chemical composition of methanogenic strains from permafrost and non-permafrost environments using confocal Raman microspectroscopy (CRM). CRM is a powerful tool for microbial identification and provides fingerprint-like information about the chemical composition of the cells. Our results show that the chemical composition of methanogens from permafrost-affected soils presents a high homology and is remarkably different from strains inhabiting non-permafrost environments. In addition, we performed a phylogenetic reconstruction of the studied strains based on the functional gene *mcrA* to prove the different evolutionary relationship of the permafrost strains. We conclude that the permafrost methanogenic strains show a convergent chemical composition regardless of their genotype. This fact is likely to be the consequence of a complex adaptive process to the Siberian permafrost environment and might be the reason underlying their resistant nature.

**Keywords:** methanogenic archaea; Siberian permafrost; confocal Raman microspectroscopy; chemical composition; environmental adaptations; *mcrA*

## INTRODUCTION

Methanogenic archaea are strictly anaerobic microorganisms that belong to the phylum *Euryarchaeota* and produce methane as an obligate catabolic end-product (Ferry 1993). About 85% of the annual global methane formation is mediated by methanogenic archaea (Thauer, Kaster and Seedorf 2008). Once released, methane can either be oxidized in biotic and abiotic processes or accumulate in the Earth's atmosphere as a greenhouse gas, where it will slowly oxidize by means of photochemical reactions. The atmospheric methane concentration has increased more than 2-fold in the last 200 years (Hedderich and Whitman 2006), contributing to the increase in the Earth's temperature over the last decades.

Terrestrial permafrost predominantly occurs in the northern hemisphere and covers approximately 24% of Earth's land surface. It represents a significant natural source of methane, largely of biological origin (Fung et al. 1991; Wagner et al. 2003). Arctic tundra soils in Siberia are permanently frozen throughout the year with the exception of the thin active layer, subjected to seasonal freeze–thaw cycles with *in situ* temperatures ranging from  $-35^{\circ}\text{C}$  to  $25^{\circ}\text{C}$  (Wagner et al. 2005). Several novel strains of psychrotolerant methanogenic archaea were recently isolated from the active layer of a permafrost-affected soil in the Lena Delta (Siberia, Russia). Unlike psychrophiles, psychrotolerant methanogens show a broad adaptive potential to the fluctuating environmental conditions, including a wide temperature range and the subsequent geochemical gradients (Simankova et al. 2003; Fiedler et al. 2004) as it can be observed in the active layer of the permafrost environment. Previous experiments in our labs have demonstrated the remarkable resistance of Siberian permafrost methanogenic strains against desiccation, osmotic stress, low temperatures and starvation when compared to methanogenic archaea from non-permafrost environments (Morozova and Wagner 2007; Wagner et al. 2013). They also exhibit a high level of resistance to monochromatic and polychromatic UV and ionizing radiation (Morozova et al. 2015), comparable to that of *Deinococcus radiodurans* (Brooks and Murray 1981). In addition, methanogens from Siberian permafrost environments are able to survive simulated Martian thermophysical conditions (Morozova, Möhlmann and Wagner 2007) and simulated Martian subsurface analog conditions (Schirmack et al. 2013), in contrast to other psychrophilic methanogens from non-permafrost habitats, such as *Methanogenium frigidum* (Franzmann et al. 1997) from Ace Lake, Antarctica, which cannot resist these conditions (Morozova, Möhlmann and Wagner 2007). Among the Siberian permafrost isolates, the genera *Methanosarcina* and *Methanobacterium* are broadly represented. *Methanosarcina* can metabolize a broad spectrum of substrates, including hydrogen, methanol and acetate (Liu and Whitman 2008). *Methanobacterium* species present a hydrogenotrophic metabolism, growing on  $\text{H}_2 + \text{CO}_2$  or formate (Ferry 1993).

The reasons why psychrotolerant methanogens from Siberian permafrost environments are more resistant to a broad range of extreme parameters than their relatives from psychrophilic and mesophilic non-permafrost habitats remain unknown. We hypothesize that this difference might depend on specific adaptations reflected in their biomolecules. In order to investigate the chemical composition of methanogens from Siberian permafrost and non-permafrost habitats, we used a Raman spectroscopy setup. Raman spectroscopy is a vibrational spectroscopic technique that provides fingerprint-like information about the overall chemical composition of the cell and requires a minimal sample preparation, allowing a

rapid non-destructive investigation (Rösch et al. 2005; Harz, Rösch and Popp 2009). The strains in this study were previously investigated by Fourier-transformed Raman spectroscopy in an attempt to perform a bulk analysis of their chemical composition. However, due to the nature of the cells and the presence of metabolic byproducts (Serrano et al. 2014), confocal Raman microspectroscopy (CRM) proved to be the optimal method. CRM combines a dispersive Raman setup with a high-numerical aperture confocal microscope, enabling the study of the chemical structure and composition of individual cells under diffraction-limited conditions (Krause et al. 2008; Hermelink et al. 2009). This technique has allowed the characterization of the chemotaxonomic features in multiple microorganisms to the species and even strain level (Maquelin et al. 2002).

Additionally, a phylogenetic reconstruction based on the gene *mcrA* was performed to investigate the phylogenetic relationships among the strains in this study. Microbial phylogenetics is often based on the 16S rRNA molecule, although other important molecular markers for classification are known. In methanogenic archaea, the functional gene *mcrA* codes for the  $\alpha$  subunit of the methyl coenzyme-M reductase (MCR), which catalyzes the last step of the methanogenesis (Ferry 2010). MCR is thought to be unique to methanogens and, since it retains a common function, sequence comparisons are considered to provide valid phylogenetic data (Reeve 1992). The gene *mcrA* has also proven to be an alternative to 16S rRNA in the phylogenetic analysis of methanogen populations (Luton et al. 2002).

In this study, we describe the overall chemical composition of three strains of methanogens from Siberian permafrost and two strains of methanogens from non-permafrost habitats by means of CRM in an attempt to gain insights into their different resistance to extreme and fluctuating environmental parameters. In addition, we give a phylogenetic overview of the studied strains and their evolutionary relationship based on the functional gene *mcrA*. Finally, we discuss the differences in the chemical nature in relation to the reconstructed phylogeny.

## MATERIALS AND METHODS

### Archaeal cultures

The three psychrotolerant methanogenic strains from Siberian permafrost environments used for this study were *Methanosarcina soligelidi* SMA-21 (Wagner et al. 2013), SMA-17 and SMA-27. They were isolated from the active layer of permafrost-affected soils in the Lena Delta, Siberia (Russia). In nature, they thrive in temperatures ranging from  $-45^{\circ}\text{C}$  to  $+25^{\circ}\text{C}$  and even if they can grow at temperatures down to  $0^{\circ}\text{C}$ , the optimal growth temperature of the isolates is  $28^{\circ}\text{C}$ . *Methanosarcina soligelidi* SMA-21 (DSM 26065<sup>T</sup>) and SMA-17 appear as irregular cocci,  $\sim 1\ \mu\text{m}$  in diameter and cell aggregation is often observed. They show 99.9% homology on the 16S rRNA sequence with *Methanosarcina mazei* (Mah 1980). SMA-27 cells are elongated rods,  $\sim 3\text{--}4\ \mu\text{m}$  long. Their closest relative according to the 16S rRNA molecule is *Methanobacterium lacus* (Cadillo-Quiroz et al. 2014). Additionally, two mesophilic strains from non-permafrost habitats were used as reference strains. *Methanosarcina barkeri* DSM 8687 originates from a peat bog in northern Germany (Maestrojuan et al. 1992) and *Ms. mazei* DSM 2053 was isolated from a mesophilic sewage sludge plant in California, USA. Both strains were obtained from the German Culture Collection of Microorganisms and Cells (DSMZ, Braunschweig, Germany), appear as irregular cocci,  $\sim 1\ \mu\text{m}$  in diameter, grow in colonies and are found in diverse environments.

Both show an empirical optimal growth at the temperature of 28°C.

### Growth conditions of methanogenic strains

For an accurate comparison of the spectra, the Raman measurements were performed in living cells from pure cultures grown at optimal conditions at 28°C and at their stationary phase of growth (approximately 3 weeks after inoculating the cultures). The permafrost strains were not grown at simulated permafrost conditions for the following reasons: (i) permafrost conditions are extremely difficult to simulate, considering the yearly long-term freezing and thawing cycles, that consequently cause changes in the salinity and the geochemical gradients, very difficult to accurately simulate in culture conditions. (ii) The freezing and thawing cycles that would partly recreate permafrost conditions would cause environmental stress on the cells due to the changing parameters. Therefore, the permafrost populations would contain less viable healthy cells and the quality of the cultures between fresh non-permafrost cultures and aged permafrost cultures exposed to environmental stress would not allow a fair comparison of the chemical composition.

Pure cultures were grown in sealed bottles that contained 50 mL of MW medium [(L<sup>-1</sup>): NH<sub>4</sub>Cl 0.25 G, MgCl<sub>2</sub> × 6H<sub>2</sub>O, 0.4 G, CaCl<sub>2</sub> × 2H<sub>2</sub>O 0.1 G, KCl, 0.5 G, KH<sub>2</sub>PO<sub>4</sub>, 0.2 G, Na HCO<sub>3</sub>, 2.7 G, cysteine, 0.3 G, Na<sub>2</sub>S, 0.2 G; trace element solution (Balch et al. 1979), 10 mL; vitamin solution (Bryant et al. 1971), 10 mL] in *Methanosarcina* strains and CS medium [(L<sup>-1</sup>): NH<sub>4</sub>Cl, 0.3 G, MgCl<sub>2</sub> × 6H<sub>2</sub>O, 0.4 G, CaCl<sub>2</sub> × 2H<sub>2</sub>O, 0.16 G, NaCl, 1.0 G, KCl, 0.5 G, K<sub>2</sub>HPO<sub>4</sub> 0.25 G, Na HCO<sub>3</sub>, 2.7 G, Na-acetate, 0.25 G, Na<sub>2</sub>S<sub>2</sub>O<sub>4</sub>, 0.1 G, Na<sub>2</sub>S, 0.25 G; trace element solution (Imhoff-Stuckle and Pfennig 1983), 1 mL; vitamin solution (Bryant et al. 1971), 1 mL] in the case of SMA-27 (since the growth of SMA-27 in MW medium was suboptimal). Both media contain 2 mL resazurin (7-hydroxy-3H-phenoxazin-3-on-10-oxide). The bottles were flushed and pressurized to one atmosphere with H<sub>2</sub>/CO<sub>2</sub> (80:20 v/v). For sample preparation, 200 mL from four sets of pure cultures in the stationary phase of growth were centrifuged at 7900 g for 40 min and 4°C and washed twice in 200 mL of distilled water at 4600 g for 30 min and 4°C. 7 μL of the cell suspensions were air-dried onto a CaF<sub>2</sub> slide, previously diluted 1:10 and 1:100 for a better observation of the single cells.

### Raman microspectroscopy

Raman spectra were captured using a WITec (Ulm, Germany) Model alpha 300R confocal Raman microscope (CRM), calibrated according to the manufacturer's instructions with an Ar/Hg spectral lamp. The CRM contained an ultra-high throughput spectrometer (UHTS300) and used a back-illuminated EM-CCD camera (Andor Technology PLC, Belfast, Northern Ireland) as detector. All the measurements presented in this article were performed with an apochromatic Nikon E Plan (100×/0.95) objective (Tokyo, Japan) and a working distance of 0.230 mm at an excitation wavelength of 532 nm (frequency doubled Nd-YAG laser; 35 mW laser power). A minimum of 20 individual cells were measured, each of them with 5s of accumulation time under full pixel binning and without gaining at the camera. Further technical details about the Raman equipment and measurements were reported in detail in Serrano et al. (2014).

For hierarchical clustering of the CRM spectra, a cosmic ray removal procedure was first performed on the spectra, followed by the individual export of each spectrum via an ASCII interface into OPUS 5.5 (Bruker Optik GmbH, Rheinstetten, Germany).

As part of the pre-processing, we carried out a quality test in order to assess the signal-to-noise ratio and a pre-selection of the cell-based spectra that contains the principal components of the spectrum. The first derivative with Savitzky-Golay smoothing/derivative filter was applied using nine smoothing points and normalized vectors. Spectral distances between pairs of individual spectra were obtained based on the data from the 796–1854 and 2746–3205 cm<sup>-1</sup> spectral regions as *D*-values (Naumann 2000) derived from normalized Pearson's product momentum correlation coefficient. The normalization allows a variation between *D*-value = 0 (*r* = 1: high correlated data/identity), *D*-value = 1000 (*r* = 0: uncorrelated data) and *D*-value = 2000 (*r* = -1: anti-correlated spectra) and prevents negative values (Helm, Labischinski and Naumann 1991). Average linkage was used as the clustering method. For the cluster analysis of the individual spectra, the same method was applied to the average spectra obtained from averaging the individual spectra of each strain used in this study, including the outlying spectra.

The individual Raman intensities of all strains within the regions of 850–1850 and 2750–3200 cm<sup>-1</sup> were treated as statistical variables and subjected to a rigid rotation via a principal component analysis (PCA) using the commercial software package MATLAB R 2014 (The Mathworks Inc, Natick, MA). This allows for the reduction of the original variables into fewer, independent variables and to visualize and compare spectra between permafrost and non-permafrost methanogenic strains.

### Phylogenetic analysis

For phylogenetic analysis based on the *mcrA* sequence, the DNA was extracted from pure cultures of the five mentioned strains following the user manual of the UltraClean® DNA purification kit. The *mcrA* gene (Bokranz et al. 1988) was amplified with the primers ME1 (forward: gCMATgCARATHggWATgTC) and ME2 (reverse: TCATKgCTAgTTDggRTAgT). The PCR consisted in 32 cycles of 1min at 94°C (denaturation) followed by 1 min at 55°C (annealing) and 1 min at 72°C (elongation). A previous denaturation stage (10 min, 95°C) and a final elongation (10 min, 72°C) were performed, resulting in a 710 base pairs gene product. Sequencing was performed by GATC Biotech (Constance, Germany). The consensus sequence was obtained using the software CodonCode Aligner (Codoncode Cooperation, MA, USA). The nucleotide sequences from the Siberian permafrost strains were uploaded in GeneBank under the numbers KJ432634 (*mcrA* Ms. *soligelidi* SMA-21), KJ432635 (*mcrA* SMA-17) and KJ432633 (*mcrA* SMA-27).

A multiple alignment of the five *mcrA* sequences was performed with ClustalW (Thompson, Higgins and Gibson 1994) through Geneious pro 5.6.6 (Biomatters Ltd.) and a maximum likelihood tree (1000 bootstraps) was built using the GTR substitution model including the methanogenic archaea *Methanopyrus kandleri* (Kurr et al. 1991) order *Methanopyrales*, (Genbank U57340) as an outgroup.

## RESULTS

### Raman spectra of permafrost and non-permafrost methanogens

The Raman spectra of the analyzed strains *Ms. soligelidi* SMA-21, SMA-17 and SMA-27 from Siberian permafrost and *Ms. barkeri* and *Ms. mazei* from non-permafrost habitats are illustrated in Fig. 1 and described Table 1. The highest Raman intensity in all spectra was the CH<sub>2</sub> stretching vibration around

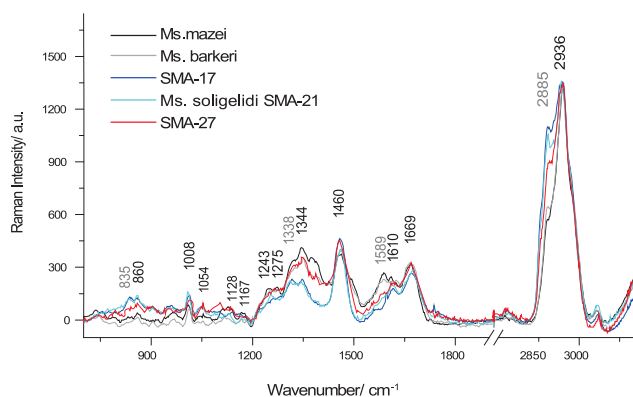

**Figure 1.** Average Raman spectra of methanogenic strains from Siberian permafrost (*Ms. soligelidi* SMA-21, SMA-17 and SMA-27) and non-permafrost environments (*Ms. mazei* and *Ms. barkeri*) measured with an excitation wavelength of 532 nm. Note that values corresponding to the band positions specific to one or a few strains are presented in grey.

2936 cm<sup>-1</sup>. The spectra from permafrost strains exhibited a shoulder at 2885 cm<sup>-1</sup>, which corresponds to the symmetric CH<sub>3</sub> stretching (Socrates 2004), indicating significant differences in the aliphatic chain composition between permafrost and non-permafrost methanogenic strains. Raman modes of proteins were found at 1669 cm<sup>-1</sup> (amide I) and at 1243–1275 cm<sup>-1</sup> (region of amide III). Their intensities are correlated and show slightly lower values for *Ms. soligelidi* SMA-21 and SMA-17. The peak at 1610 cm<sup>-1</sup> corresponds to the bond C = C found in aromatic amino acids phenylalanine and tyrosine and reached higher intensities in non-permafrost strains, whereas the peak at 1589 cm<sup>-1</sup> is associated to the ring breathing modes of ribonucleotides guanine and adenine as well as the amino acid tryptophan and was absent in permafrost strains. The intensity of the 1460 cm<sup>-1</sup> band, attributed to CH<sub>2</sub> deformation, was similar in all strains investigated. The peaks at 1344 and 1338 cm<sup>-1</sup> were both

assigned to the deformation of the group CH in carbohydrates and proteins (Ivleva et al. 2009). The peak at 1344 cm<sup>-1</sup> reached the highest intensity for *Ms. mazei*, the lowest for *Ms. soligelidi* SMA-21 and SMA-17 and intermediate values for SMA-27 and *Ms. barkeri*, whereas the one at 1338 cm<sup>-1</sup> was unique to the permafrost strains SMA-21 and SMA-17. All the mentioned bands varied slightly in bandwidth, position and intensity for each strain. The peaks in the spectral region located between 1200 and 800 cm<sup>-1</sup> showed relative higher intensities in permafrost strains than in non-permafrost strains, including the bands located at 1167 cm<sup>-1</sup> (C–C and C–O ring breathing), 1128 cm<sup>-1</sup> (characteristic of the C–O–C in the glycosidic link) and 1054 cm<sup>-1</sup> (C–O and C–C from carbohydrates, and C–C and C–N in proteins, Neugebauer et al. 2007). The band at 1008 cm<sup>-1</sup> was attributed to the symmetric benzene/pyrrole in-phase and out-of-phase breathing modes of phenylalanine (Ivleva et al. 2009). The band at 860 cm<sup>-1</sup> corresponded to the C–C stretching modes and the C–O–C glycosidic link in polysaccharides (Pereira et al. 2004), and the peak at 835 cm<sup>-1</sup> was exclusive to the permafrost strains and was attributed to the ring breathing of the amino acid tyrosine and the group O–P–O present in nucleic acids (Ivleva et al. 2009).

The cluster analysis based on the Raman spectra showed the similarities and differences in the overall chemical composition of permafrost and non-permafrost strains in the stationary phase, revealing two chemically different clusters illustrated in Figs 2 (individual spectra) and 4A (average spectra). CRM spectra corresponding to individual cells of the same microbial strain clustered together, with the exception of two spectra from SMA-27 and three spectra from *Ms. soligelidi* SMA-21 (Fig. 2). The outlying spectra of SMA-27 were equally distant to the spectra of the SMA-27 cluster and the *Ms. soligelidi* SMA-21/SMA-17 cluster, separated by the distance of 104.6 and 123.1 D-value units, respectively. Three outlying spectra of *Ms. soligelidi* SMA-21 were separated by 70.8 D-value units from the *Ms. soligelidi* SMA-21/SMA-17 cluster. Spectra from *Ms. mazei*, *Ms. barkeri* and SMA-17 cells were less heterogeneous and grouped into unique clusters at the strain level.

**Table 1.** Description of the Raman bands identified in the spectra of the methanogenic strains from Siberian permafrost (*Ms. soligelidi* SMA-21, SMA-17 and SMA-27) and the mesophilic methanogens (*Ms. mazei* and *Ms. barkeri*) measured with an excitation wavelength of 532 nm. The values of the bands exclusive to one or a few strains are presented in grey. + indicates the presence of a certain band, and – its absence. Qualitative differences are indicated with the symbol (+), meaning a higher intensity of the peak and therefore cellular abundance.

| Wavenumber (cm <sup>-1</sup> ) | Description                                                                                                 | <i>Ms. mazei</i> | <i>Ms. barkeri</i> | SMA-17 | <i>Ms. soligelidi</i> SMA-21 | SMA-27 |
|--------------------------------|-------------------------------------------------------------------------------------------------------------|------------------|--------------------|--------|------------------------------|--------|
| 2936                           | CH <sub>3</sub> str and CH <sub>2</sub> str                                                                 | +                | +                  | +      | +                            | +      |
| 2885                           | CH <sub>3</sub> str sym                                                                                     | -                | -                  | +      | +(+)                         | +(+)   |
| 1669                           | amide I (C = O str, NH <sub>2</sub> bend, C = N str)                                                        | +(+)             | +(+)               | +      | +                            | +(+)   |
| 1610                           | C = C (Phe, Tyr)                                                                                            | +(+)             | +(+)               | +      | +                            | +      |
| 1589                           | G + A ring str (nucleic acids); Trp                                                                         | +                | +                  | -      | -                            | -      |
| 1460                           | δ(CH <sub>2</sub> ) scis, CH <sub>2</sub> def                                                               | +                | +                  | +      | +                            | +      |
| 1344                           | δ(CH)                                                                                                       | +(+)             | +(+)               | +      | +                            | +(+)   |
| 1338                           | δ(CH)                                                                                                       | -                | -                  | +      | +                            | -      |
| 1275–1243                      | Amide III                                                                                                   | +(+)             | +(+)               | +      | +                            | +(+)   |
| 1167                           | C–C, C–O ring breath, asym                                                                                  | +                | +                  | +      | +                            | +      |
| 1128                           | C–C str, C–O–C glycosidic link; ring breath, sym (carbohydrates); C–N, C–C str (proteins); C–C str (lipids) | +                | +                  | +      | +                            | +      |
| 1054                           | C–O, C–C str (carbohydrates); C–C; C–N (proteins)                                                           | +                | +                  | +(+)   | +(+)                         | +(+)   |
| 1008                           | n(CC) aromatic ring (Phe)                                                                                   | +                | +                  | +(+)   | +(+)                         | +(+)   |
| 860                            | C–C str; C–O–C glycosidic link                                                                              | +                | +                  | +(+)   | +(+)                         | +(+)   |
| 835                            | Ring breath Tyr; O–P–O str (DNA/RNA)                                                                        | -                | -                  | +      | +                            | +      |

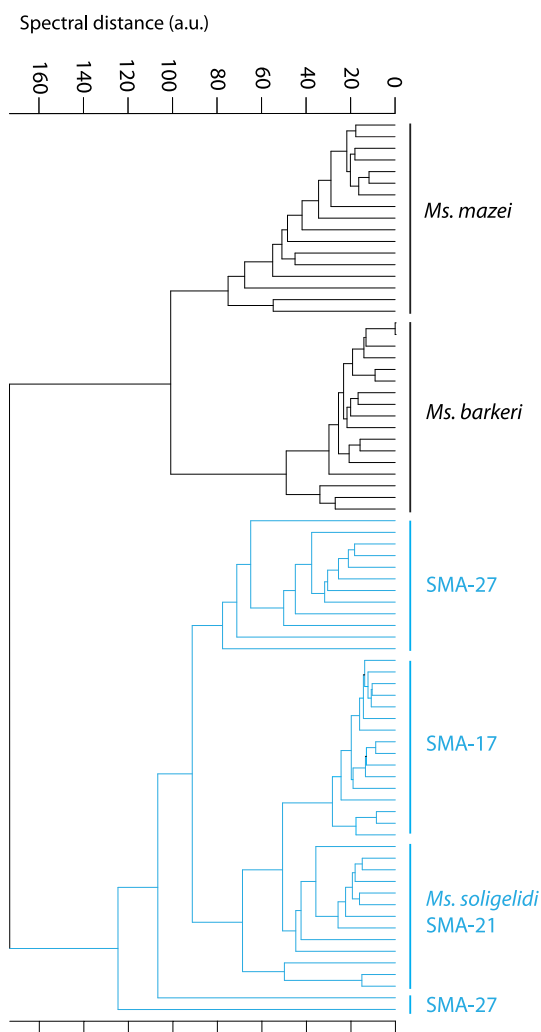

**Figure 2.** Cluster analysis (average linkage method) of Raman spectra from individual cells from permafrost and non-permafrost strains in the stationary phase. CRM spectra from *Methanosarcina mazei* and *Ms. barkeri* (non-permafrost strains) form a cluster, which is well separated from the cluster of permafrost strains (SMA-27, *Ms. soligelidi* SMA-21 and SMA-17).

The cluster analysis in Fig. 4A shows an overview of the phenotypic resemblance in the chemical composition based on the average spectra of each strain, obtained from averaging the individual spectra, including the outliers (and therefore disregarding the intraspecific variances in the heterogeneity). Strains *Ms. soligelidi* SMA-21 and SMA-17 were most similar, separated by 15.6 *D*-values. The cluster *Ms. soligelidi* SMA-21/SMA-17 was closely related to the strain SMA-27, also from Siberian permafrost, distanced by 37.8 *D*-values. Apart from the permafrost group, the spectra from *Ms. mazei* and *Ms. barkeri* (non-permafrost strains) grouped together, separated by 24.4 *D*-value units. The total distance between the permafrost and the non-permafrost cluster was 84.4 *D*-values.

The PCA in Fig. 3A shows the score plot of the first 3 principal components (PCs) that cumulatively captured 88.04% of the total variance in the spectral regions of interest. It demonstrated that each strain occupies a distinct variable space, forming non-overlapping data clouds. Additionally, PC1 can effectively separate the permafrost and the non-permafrost groups (note that PCA has been carried out on normalized spectra), illustrating

shared spectral features within each of the two groups and divergent spectral features between these groups. Figure 3B shows the loadings of the first three PCs. PC1 (62.72% of the variance) is dominated by strong bands at the labeled wavelengths, which correspond to the vibrational modes of proteins, carbohydrates, nucleic acids and lipids (Neugebauer et al. 2007; Ivleva et al. 2009) and illustrate additional differences within the chemical composition between permafrost and non-permafrost strains. The downward peaks correspond to distinct features shared by non-permafrost methanogens, whereas the upward peaks correspond to shared features of permafrost methanogens.

### Phylogenetic relationships of methanogenic archaea

A maximum likelihood tree (GTR substitution model, 1000 bootstraps) was built for the studied methanogens according to the *mcrA* nucleotide sequence, using *Methanopyrus kandleri* as the outgroup (Fig. 4B). All the *Methanosarcina* species clustered together, with *Ms. soligelidi* SMA-21 and SMA-17 from the Siberian permafrost showing identical *mcrA* sequences. The cluster *Ms. soligelidi* SMA-21/SMA-17 was closely related to *Ms. mazei*, sharing a 98.5% identity in their sequences. *Methanosarcina mazei* and *Ms. barkeri* presented a 91.5% homology. Finally, SMA-27 was the most evolutionary distant strain, sharing only 61% of the *mcrA* nucleotide sequence with the rest of the studied strains.

### DISCUSSION

Previous studies have shown that methanogenic archaea from permafrost habitats are more tolerant to different environmental stress factors compared to those from non-permafrost areas (Morozova and Wagner 2007; Morozova, Möhlmann and Wagner 2007; Morozova et al. 2015). In this study, we have shown that Siberian permafrost and non-permafrost strains could be classified into two different groups according to their chemical composition on the basis of the CRM analysis. The Siberian permafrost strains (*Ms. soligelidi* SMA-21, SMA-27 and SMA-17) show a higher degree of similarity in their chemistry and the spectral clusters of SMA-27 and *Ms. soligelidi* SMA-21 present outlying spectra, suggesting that their populations are more chemically heterogeneous than the other strains (Fig. 2). However, the high phenotypic heterogeneity within a cell population and diversity between different growth phases described for *Ms. soligelidi* SMA-21 (Serrano et al. 2014) were also observed in all the strains investigated in this study. When comparing the cluster analysis of the individual spectra (Fig. 2) with the average spectra (Fig. 4A), two puzzling facts concerning the scale, and therefore the heterogeneity, were observed: (i) the scales were different, despite referring to the same data; (ii) the heterogeneity within the SMA-27 population was larger than the overall distance in the average spectra. The explanation relies on the fact that the average spectra were obtained by averaging the single spectra from each strain, including the outliers, which considerably increased the variance of the corresponding strains (*Ms. soligelidi* SMA-21 and most remarkably SMA-27). The largely different variances within each strain were therefore not proportionally weighed for the cluster analysis of the average spectra and, despite this fact, the permafrost and the non-permafrost strains cluster in different groups according to their chemical composition.

The clusters resulting from the PCA of the individual spectra (Fig. 3A) support the cluster analysis in Fig. 2, evidencing that CRM can be used to differentiate between strains, which form non-overlapping data clouds on the plot. Furthermore, the

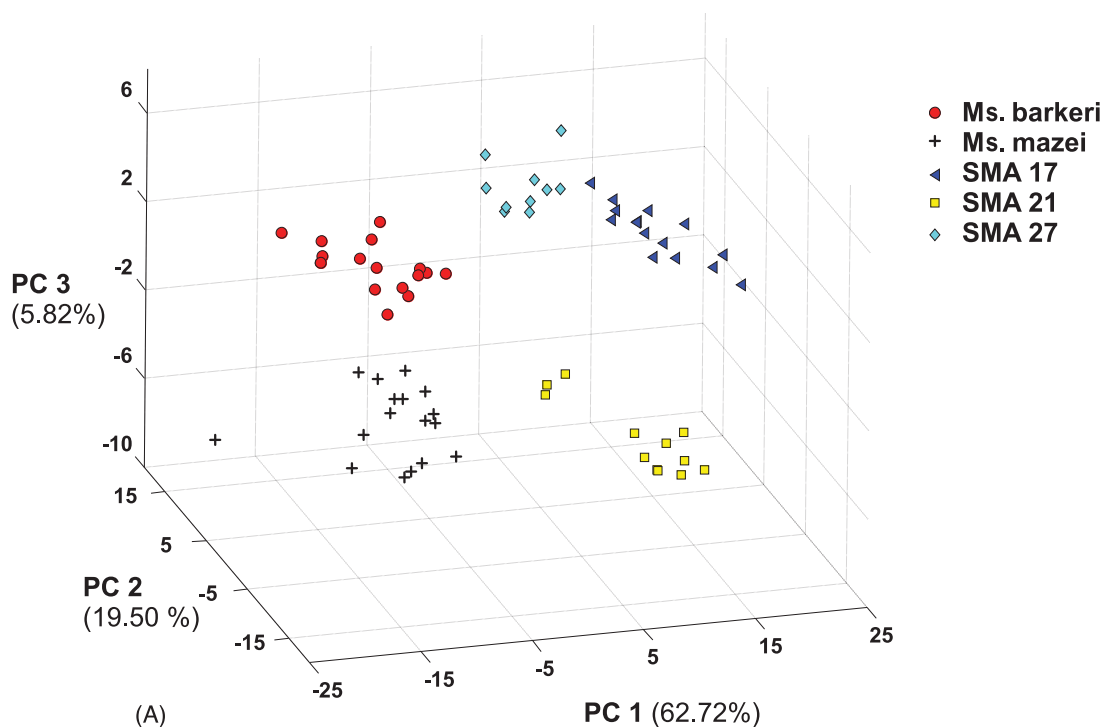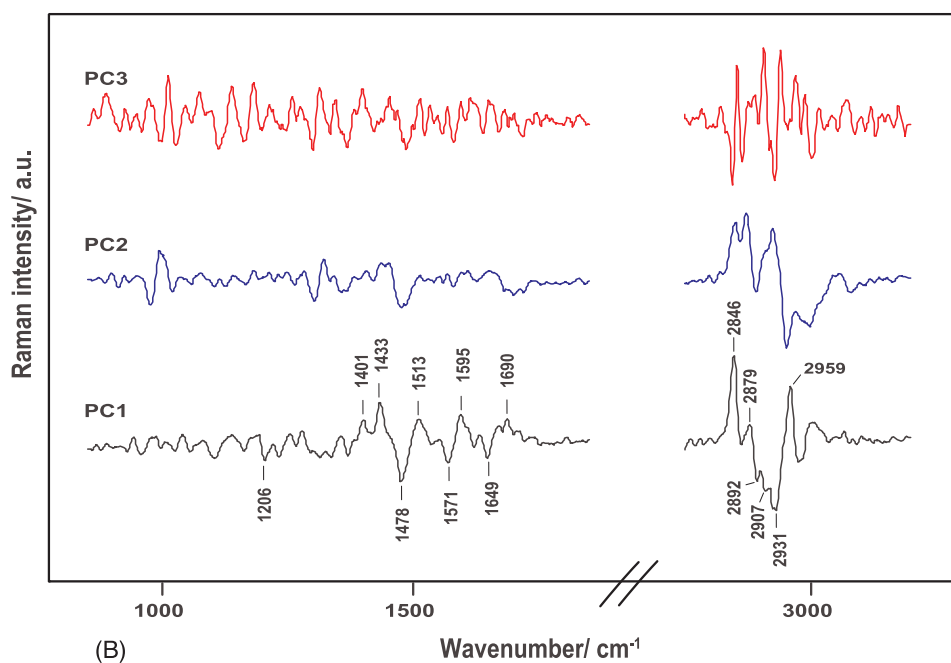

Figure 3. PCA of the individual spectra of the five methanogenic strains. (A) Score plot of the first three principal components (PCs) of the total variance of the spectra. (B) Loadings of the first three principal components, illustrating the major spectral differences in PC1 (labeled peaks).

first principal component has separated out permafrost from non-permafrost strains. However, the Raman-spectroscopic differences between permafrost and non-permafrost strains (Figs 1 and 3B) are non-conclusive when it comes to pointing to specific biomolecules that differentiate the two groups. Raman spectroscopy exclusively shows the differences in the vibrational

modes and thus in the chemical composition, without revealing the biomolecule itself. For example, the band at  $2885\text{ cm}^{-1}$  (Fig. 1) corresponds to the symmetric  $\text{CH}_3$  stretching, indicating significant differences in the aliphatic chain composition between permafrost and non-permafrost methanogens, but this technique does not allow for the identification of specific phospholipids.

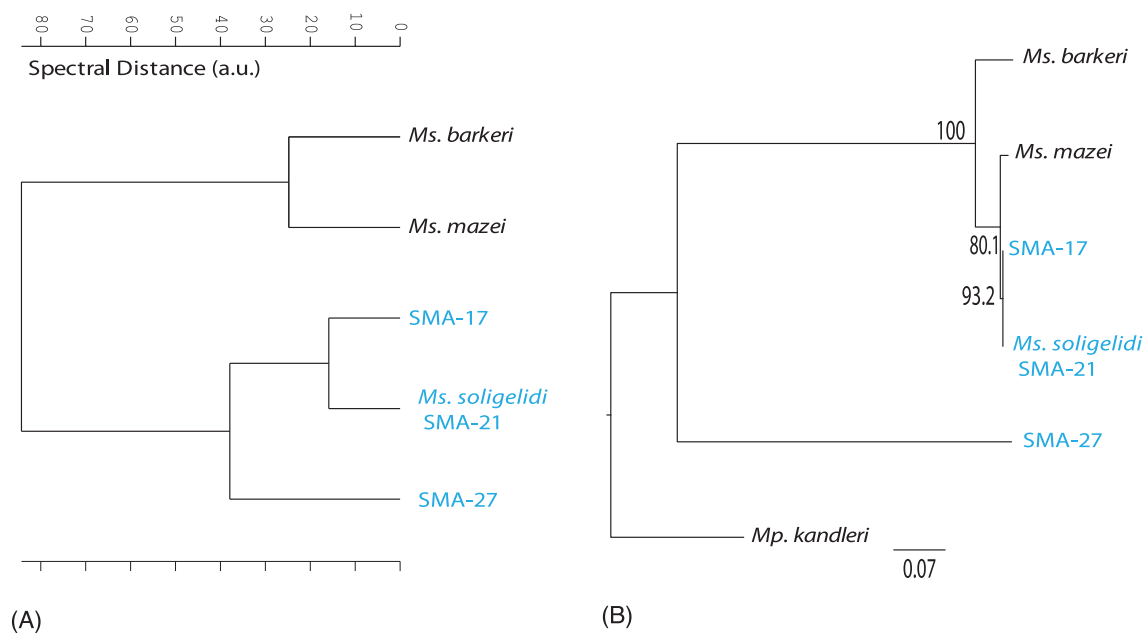

**Figure 4.** Chemical vs. phylogenetic relationships of methanogenic archaea from Siberian permafrost *Ms. soligelidi* SMA-21, SMA-17 and SMA-27 (in blue) and the two non-permafrost strains used as reference *Ms. barkeri* and *Ms. mazei*. (A) Cluster analysis of the average Raman spectra from permafrost and non-permafrost strains in the stationary phase using the average linkage clustering method. (B) Maximum likelihood tree (GTR substitution model, 1000 bootstraps) according to the *mcrA* nucleotide sequence. *Methanopyrus kandleri* (*Methanopyrales*) was used as the outgroup. The branch support values indicated in the nodes show the robustness of the phylogenetic reconstruction.

On the other hand, the evolutionary relationships among the strains do not correspond in all cases with the topology found for the chemical composition. The phylogenetic relationship provided by the gene *mcrA* proves that the permafrost strains do not form a monophyletic group (Fig. 4B). The *mcrA* sequences of *Methanosarcina* strains from the Siberian permafrost (SMA-21 and SMA-17) are closely related to each other, whereas SMA-27 presents only 61% of homology with the rest of the strains and aligned with the genus *Methanobacterium*. Sequence alignments of the 16S rRNA molecule corroborate these findings, evidencing that SMA-27 forms a distantly related sister group. The non-permafrost strains, *Ms. mazei* and *Ms. barkeri*, share a remarkable degree of homology in both chemical composition and genetic information. The maximum likelihood analysis based on *mcrA* shows a full bootstrap support for the node that separates *Ms. barkeri* (Fig. 4B). Although the other two nodes within that group are not completely resolved, it is evidenced that *Ms. mazei* is the most closely related strain to *Ms. soligelidi* SMA-21 and SMA-17.

This study proves that Siberian permafrost methanogenic strains share a related chemistry, regardless of their evolutionary origin. In other words, methanogens with different genotypes can exhibit an analogous phenotype in terms of chemical composition. This finding points to the evidence of the complexity of the adaptations to the environmental conditions, suggesting that methanogenic strains from Siberian permafrost may have developed common biochemical adaptations to sub-zero temperatures, freeze-thaw cycles, osmotic stress and high levels of background radiation over geological time scales. A plausible phenomenon explaining the convergent chemical composition in permafrost strains despite their different genotype is the horizontal gene transfer (HGT) (Jain, Rivera and Lake 1999). HGT allows the rapid incorporation of novel functions that provide a selective advantage to the organism and there is a proof of HGT in the evolution of some genes coding for enzymes involved in

methanogenic pathways (Fournier, Huang and Gogarten 2009). The Alien Hunter program (Vernikos and Parkhill 2006) predicted that between 35% and 51% of the genome of methanogenic archaea has undergone HGT, and the highest percentage corresponded to the psychrophilic archaeon *Methanococcoides burtonii* (Allen et al. 2009). However, the gene *mcrA* chosen for this study is not affected by this phenomenon. All *mcr* operons appear to have evolved from a common ancestor and since MCR plays a key role in the methanogenesis, it is highly conserved and provides valid phylogenetic information, independent of the 16S rRNA information (Reeve 1992). Despite this fact, other operational genes involved in perhaps anabolic pathways may have experienced HGT with the consequent production of molecules/metabolites that might have provided a selective phenotypic advantage to the cells. That selective advantage would enable them to survive in the Siberian permafrost environment and leading to a convergent chemical phenotype of the methanogenic archaea. The specific biomolecules that are different for permafrost and non-permafrost strains and may provide the selective advantage, however, cannot be discriminated by means of CRM.

CRM allows the discrimination between molecules based on their specific vibrational modes. When investigating the composition of a single cell, CRM can be used to describe only the Raman-active biomolecules, such as molecules containing aromatic rings (phenylalanine, tryptophan, pigments etc.), but this technology does not allow the identification of specific biomolecules (e.g. a particular protein or carbohydrate).

Fig. 1 and Table 1 illustrate both the quantitative (band intensities) and qualitative (band position) chemical differences found between spectra of permafrost (psychrotolerant) and non-permafrost (mesophilic) methanogens cultured at their optimal conditions and growth temperature (28°C). Some peaks experience a slight shift in comparison to their standard value in the literature (e.g. the symmetric benzene/pyrrole in-phase and out-of-phase breathing modes of phenylalanine appear at 1008 cm<sup>-1</sup>

in contrast to Ivleva et al. 2009; with the same peak described at  $1003\text{ cm}^{-1}$ ). Although the calibration of the spectrometer was verified once a week, calibration errors of 3–5 wavenumber units (deviation of approximately one pixel of the  $1024 \times 128$  CCD element) cannot be excluded. However, a systematic calibration error of the CRM measurements is expected to only exert a minor effect on the results of cluster or PCA. Furthermore, the Raman peaks illustrating the differences between the permafrost and non-permafrost groups are not identical in Figs 1 and 3B, although they are focused in the same major spectral regions. For instance, the region  $1571\text{--}1690\text{ cm}^{-1}$  in the average spectra (Fig. 1) contains minor fluctuations that correlate with the peaks identified on the PCA (Fig. 3B). This spectral region corresponds to proteins (amide I,  $1669\text{ cm}^{-1}$ ) and aromatic amino acids, and evidences differences between permafrost and non-permafrost strains. The same fact is observed within the region  $2846\text{--}2959\text{ cm}^{-1}$  (Fig. 1), which corresponds to lipids: multiple additional differences in the vibrational modes of permafrost and non-permafrost methanogens are revealed within that region on the PCA (Fig. 3B).

The underlying compositional differences might be correlated with convergent biochemical adaptations to the Siberian permafrost environment and could explain the resistant nature of the permafrost strains when compared to other non-permafrost methanogens. These adaptations to the Siberian permafrost environment might be related to one or multiple adaptive mechanisms to cold, radiation, desiccation, osmotic stress and their corresponding seasonal fluctuations. The adaptive mechanisms described for psychrotolerant methanogenic archaea include modifications in cellular components and functional machinery or proteins in order to maintain their structural flexibility and activity under cold temperatures and changing conditions (Dong and Chen 2012). For instance, the membrane lipids show increasing levels of unsaturation of the fatty acids (Cavicholi, Thomas and Curmi 2000). In Fig. 1, the peak at  $2936\text{ cm}^{-1}$  ( $\text{CH}_2$  stretching region) presents a similar intensity for all strains, pointing to the fact that the lipid content is comparable. Next to it, the peak at  $2885\text{ cm}^{-1}$  (symmetric  $\text{CH}_3$  stretching) reveals a noticeable contrast between permafrost and non-permafrost strains, denoting qualitative differences in the aliphatic chain composition of the lipids (Socrates 2004), even when growing at mesophilic temperatures. In addition, previous studies have reported that proteins in psychrotolerant methanogens present a reduced hydrophobic core and a less-charged protein surface (Reed et al. 2013), as well as cold-adaptive chaperone proteins, such as Csp, CSD and TRAM domain proteins (Giaquinto, Curmi and Siddiqui 2007). This study shows that the protein levels are slightly more abundant in non-permafrost strains and SMA-27, according to the amide I ( $1669\text{ cm}^{-1}$ ) and amide III bands ( $1275\text{--}1243\text{ cm}^{-1}$ ), which correspond to the peptide bond of proteins. On the other hand, the peak at  $1610\text{ cm}^{-1}$  is unique to phenylalanine and tyrosine and it is more abundant in non-permafrost strains. However, the peak at  $1008\text{ cm}^{-1}$ , assigned to phenylalanine, is slightly higher in the permafrost methanogenic strains. The peaks at  $1589$  and  $835\text{ cm}^{-1}$  correspond also to aromatic amino acids, but are not unique to them. These findings are in principle compatible with the reduced hydrophobic cores of proteins in psychrotolerant methanogens found by Reed et al. (2013), since the proteins from permafrost methanogenic strains present relatively less aromatic (and hydrophobic) amino acids, with the exception of phenylalanine. Unfortunately, only the aromatic amino acids tryptophan, tyrosine and phenylalanine produce Raman scattering,

and therefore this technique does not allow further amino acid identification.

Particularly interesting is the band at  $860\text{ cm}^{-1}$ , which is especially prominent in permafrost strains and was previously assigned to the C–O–C 1,4-glycosidic link present in carbohydrates and polysaccharides (Pereira et al. 2004; Ivleva et al. 2009). This distinctive band together with the band at  $1338\text{ cm}^{-1}$  confirms the presence of polysaccharide of similar nature in permafrost strains. Many microorganisms, including archaea, have been reported to produce exopolysaccharides (sugar-based polymers that are secreted by microorganisms to the surrounding environment) as a strategy to survive adverse conditions (Poli et al. 2011). In fact, they have been shown to play a protective role against desiccation (Ophir and Gutnick 1994), which might be the case of the permafrost methanogenic strains in the perennially frozen ground or frozen period of the active layer.

In conclusion, this study presents proof of concept that distantly related methanogens (*Methanosarcina* and *Methanobacterium*) occurring in the same habitat have independently developed similarities in the chemical composition (Pikuta, Hoover and Tang 2007). Extreme conditions such as sub-zero temperatures and osmotic stress generally affect macromolecule structures and the thermodynamics of chemical reactions, having the same impact on all microorganisms. Hence, microorganisms that inhabit in the same extreme environment have proven that the features and adaptations that unite them as a group are stronger than the variation imposed by their phylogeny (Cavicholi 2006). The microbial communities of permafrost environments have been often referred to as a ‘community of survivors’ (Friedmann 1994) that have found themselves trapped in this environment and have outcompeted those unable to withstand the given environmental conditions through a process of continuous selection that lasted millions of years (Gilichinsky, Soina and Petrova 1993). The Siberian permafrost methanogenic strains in this study corroborate the convergence of a certain phenotype in response to the surrounding environment, independent of the genotype.

## SUPPLEMENTARY DATA

Supplementary data are available at FEMSEC online.

## ACKNOWLEDGEMENTS

The authors acknowledge Christoph Liedtke (University of Basel) and Susanne Liebner (GFZ German Research Centre for Geosciences) for advice on phylogenetic reconstructions and Mashal Alawi (GFZ German Research Centre for Geosciences) for his comments on the manuscript.

## FUNDING

This work was supported by the Federal Ministry of Economics and Technology (BMWi) by a grant to DW (50WB1152).

**Conflict of interest.** None declared.

## REFERENCES

- Allen M, Lauro F, Williams T, et al. The genome sequence of the psychrophilic archaeon, *Methanococcoides burtonii*: the role of genome evolution in cold adaptation. *ISME J* 2009;3: 1012–35.



- Balch W, Fox G, Magrum L, et al. Methanogens: reevaluation of a unique biological group. *Microbiol Rev* 1979;**43**:260–96.
- Bokranz M, Baumner G, Allmansberger R, et al. Cloning and characterization of the methyl coenzyme M reductase genes from *Methanobacterium thermoautotrophicum*. *J Bacteriol* 1988;**170**:568–77.
- Brooks BW, Murray RGE. Nomenclature for “*Micrococcus radiodurans*” and other radiation-resistant cocci: Deinococcaceae fam. nov. and Deinococcus gen. nov., including five species. *Int J Syst Bacteriol* 1981;**31**:353–60.
- Bryant MP, Tzeng SF, Robinson JM, et al. Nutrient requirements of methanogenic bacteria. *Adv Chem Ser* 1971;**105**:23–40.
- Cadillo-Quiroz H, Bräuer SL, Goodson N, et al. *Methanobacterium paludis* sp. nov. and a novel strain of *Methanobacterium lacus* isolated from northern peatlands. *Int J Syst Evol Microbiol* 2014;**64**:1473–80.
- Cavicchioli R Cold-adapted archaea. *Nat Rev Microbiol* 2006;**4**:331–43.
- Cavicchioli R, Thomas T, Curmi PMG. Cold stress response in archaea. *Extremophiles* 2000;**4**:321–31.
- Dong X, Chen Z. Psychrotolerant methanogenic archaea: diversity and cold adaptation mechanisms. *Sci China Life Sci* 2012;**55**:415–21.
- Ferry JG. *Methanogenesis. Ecology, Physiology, Biochemistry and Genetics*. New York, London: Chapman and Hall, 1993.
- Ferry JG The chemical biology of methanogenesis. *Planet Space Sci* 2010;**58**:1775–83.
- Fiedler S, Wagner D, Kutzbach L, et al. Element redistribution along hydraulic and redox gradients of low-centered polygons, Lena Delta, Northern Siberia. *Soil Sci Soc Am J* 2004;**68**:1002–11.
- Fournier GP, Huang JL, Gogarten JP. Horizontal gene transfer from extinct and extant lineages: Biological innovation and the coral of life. *Philos Trans R Soc Lond B Biol Sci* 2009;**364**:2229–39.
- Franzmann PD, Liu Y, Balkwill DL, et al. *Methanogenium frigidum* sp. nov., a psychrophilic, H<sub>2</sub>-using methanogen from Ace Lake, Antarctica. *Int J Syst Bacteriol* 1997;**47**:1068–72.
- Friedmann EI Permafrost as microbial habitat. In: Gilichinsky DA (ed.). *Viable Microorganisms in Permafrost*. Pushchino: Russian Academy of Science, 1994, 21–26.
- Fung I, John J, Lerner J, et al. Three-dimensional model synthesis of the global methane cycle. *J Geophys Res* 1991;**96**:13033–65.
- Giaquinto L, Curmi PMG, Siddiqui KS. Structure and function of cold shock proteins in archaea. *J Bacteriol* 2007;**189**:5738–48.
- Gilichinsky DA, Soina VS, Petrova MA. Cryoprotective properties of water in the Earth cryolithosphere and its role in exobiology. *Origins Life Evol B* 1993;**23**:65–75.
- Harz M, Rösch P, Popp J. Vibrational spectroscopy- a powerful tool for the rapid identification of microbial cells at the single-cell level. *Cytom Part A* 2009;**75A**:104–13.
- Hedderich R, Whitman W. *Physiology and Biochemistry of Methane-Producing Archaea*. New York: Springer Verlag, 2006.
- Helm D, Labischinski H, Naumann D. Elaboration of a procedure for identification of bacteria using Fourier-transform infrared spectral libraries: a stepwise correlation approach. *J Microbiol Meth* 1991;**14**:127–47.
- Hermelink A, Brauer A, Lasch P, et al. Phenotypic heterogeneity within microbial populations at the single-cell level investigated by confocal Raman microspectroscopy. *Analyst* 2009;**134**:1149–53.
- Imhoff-Stuckle D, Pfennig N. Isolation and characterization of a nicotinic acid-degrading sulfate-reducing bacterium, *Desulfococcus niacini* sp. nov. *Arch Microbiol* 1983;**136**:194–8.
- Ivleva NP, Wagner M, Horn H, et al. Towards a nondestructive chemical characterization of biofilm matrix by Raman microscopy. *Anal Bioanal Chem* 2009;**393**:197–206.
- Jain R, Rivera MC, Lake JA. Horizontal gene transfer among genomes: the complexity hypothesis. *PNAS* 1999;**96**:3801–6.
- Krause M, Rösch P, Radt B, et al. Localizing and identifying living bacteria in an abiotic environment by a combination of Raman and fluorescence microscopy. *Anal Chem* 2008;**80**:8568–75.
- Kurr M, Huber R, König H, et al. *Methanopyrus kandleri*, gen. and sp. nov. represents a novel group of hyperthermophilic methanogens, growing at 110°C. *Arch Microbiol* 1991;**156**:239–47.
- Liu Y, Whitman W. Metabolic, phylogenetic, and ecological diversity of the methanogenic archaea. *Ann NY Acad Sci* 2008;**1125**:171–89.
- Luton PE, Wayne JM, Sharp RJ, et al. The mcrA gene as an alternative to 16S rRNA in the phylogenetic analysis of populations in landfill. *Microbiology* 2002;**148**:3521–30.
- Maestrojuan GM, Bonne JE, Mah RA, et al. Taxonomy and halotolerance of mesophilic *Methanosarcina* strains, assignment of strains to species, and synonymy of *Methanosarcina mazei* and *Methanosarcina frisia*. *Int J Syst Bacteriol* 1992;**42**:561–7.
- Mah RA. Isolation and characterization of *Methanococcus mazei*. *Curr Microbiol* 1980;**3**:321–6.
- Maquelin K, Choo-Smith L-P, Kirschner C, et al. Vibrational spectroscopic studies of microorganisms. In: Chalmers JM, Griffiths PR (eds). *Handbook of Vibrational Spectroscopy*. Chichester: John Wiley, 2002, 3308–34.
- Morozova D, Moeller R, Rettberg P, et al. Enhanced radiation resistance of *Methanosarcina soligelidi* SMA-21, a new methanogenic archaeon isolated from a Siberian permafrost-affected soil in direct comparison to *Methanosarcina barkeri*. *Astrobiology* 2015;**15**, DOI: 10.1089/ast.2015.1319.
- Morozova D, Möhlmann D, Wagner D. Survival of methanogenic archaea from Siberian permafrost under simulated martian thermal conditions. *Origins Life Evol B* 2007;**37**:189–200.
- Morozova D, Wagner D. Stress response of methanogenic archaea from Siberian permafrost compared with methanogens from non permafrost habitats. *FEMS Microbiol Ecol* 2007; **61**:16–25.
- Naumann D Infrared spectroscopy in microbiology. In: Meyers R. (ed.). *Encyclopedia of Analytical Chemistry: Applications, Theory and Instrumentation*. Chichester: John Wiley and Sons Ltd., 2000, 102–131.
- Neugebauer U, Schmid U, Baumann K, et al. Towards a detailed understanding of bacterial metabolism- spectroscopic characterization of *Staphylococcus epidermidis*. *ChemPhysChem* 2007;**8**:124–37.
- Ophir T, Gutnick D. A role for exopolysaccharides in the protection of microorganisms for desiccation. *Appl Environ Microbiol* 1994;**60**:740–5.
- Pereira R, Martin AA, Tierra-Criollo CJ, et al. Diagnosis of squamous cell carcinoma of human skin by Raman spectroscopy. *P SPIE* 2004;**5326**:106–12.
- Pikuta EV, Hoover RB, Tang J. Microbial extremophiles at the limits of life. *Crit Rev Microbiol* 2007;**33**:183–209.
- Poli A, Di Donato P, Abbamondi GR, et al. Synthesis, production, and biotechnological applications of exopolysaccharides and polyhydroxyalkanoates by archaea. *Archaea* 2011;**2011**:1–13.

- Reed CJ, Lewis H, Trejo E, et al. Protein adaptations in archaeal extremophiles. *Archaea* 2013;**2013**:273–5.
- Reeve JN Molecular biology of methanogens. *Annu Rev Microbiol* 1992;**46**:165–91.
- Rösch P, Harz M, Schmitt M, et al. Chemotaxonomic identification of single bacteria by micro-Raman spectroscopy: application to clean-room-relevant biological contaminations. *Appl Environ Microb* 2005;**71**:1626–37.
- Schirmack J, Böhm M, Brauer C, et al. Laser spectroscopic real time measurements of methanogenic activity under simulated Martian subsurface analog conditions. *Planet Space Sci* 2013;**98**:198–204.
- Serrano P, Wagner D, Böttger U, et al. Single-cell analysis of the methanogenic archaeon *Methanosarcina soligelidi* from Siberian permafrost by means of confocal Raman microspectroscopy for astrobiological research. *Planet Space Sci* 2014;**98**:191–7.
- Simankova MV, Kotsyurbenko OR, Lueders T, et al. Isolation and characterization of new strains of methanogens from cold terrestrial habitats. *Syst Appl Microbiol* 2003;**26**:312–128.
- Socrates G Alkane group residues: CH group. In: Socrates G (ed.). *Infrared and Raman Characteristic Group Frequencies Tables and Charts*. Chichester: John Wiley and Sons Ltd., 2004, 50–67.
- Thauer RK, Kaster AK, Seedorf H. Methanogenic archaea: ecologically relevant differences in energy conservation. *Nat Rev Microbiol* 2008;**6**:579–91.
- The MathWorks, Inc. *MATLAB and Statistics Toolbox Release*. Aachen, Germany: Natick, 2014.
- Thompson JD, Higgins DG, Gibson TJ. CLUSTAL W: improving the sensitivity of progressive multiple sequence alignment through sequence weighting, position specific gap penalties and weight matrix choice. *Nucleic Acids Res* 1994;**22**:4673–80.
- Vernikos GS, Parkhill J. Interpolated variable order motifs for identification of horizontally acquired DNA: revisiting the Salmonella pathogenicity islands. *Bioinformatics* 2006;**22**:2196–203.
- Wagner D, Kobabe S, Pfeiffer E-M, et al. Microbial controls on permafrost fluxes from a polygonal tundra of the Lena Delta, Siberia. *Permafrost Periglac Process* 2003;**14**:173–85.
- Wagner D, Lipski A, Embacher A, et al. Methane fluxes in permafrost habitats of the Lena Delta: effects of microbial community structure and organic matter quality. *Environ Microbiol* 2005;**7**:1582–92.
- Wagner D, Schirmack J, Ganzert L, et al. *Methanosarcina soligelidi* sp. nov., a desiccation and freeze-thaw resistant methanogenic archaeon isolated from a Siberian permafrost-affected soil. *Int J Syst Evol Micr* 2013;**63**:2986–91.
